# Supplementary material
Source: MDPI journal article supplement (https://www.mdpi.com/1424-2818/15/4/534)
Supplement: s1 [file s1]

**Table S1.** Molecular diversity for all *G. longipes* sequences (124 from the present study and 13 from databases). (*n*) number of sequences, (*h*) the number of different haplotypes, (*S*) the number of polymorphic sites, (*Hd*) the haplotype diversity with the standard deviation and ( $\pi \times 100$ ) the nucleotide diversity multiplied by 100, with the standard deviation.

| Parameters       | Sequences of this research | Total number of sequences (137) |
|------------------|----------------------------|---------------------------------|
| <i>n</i>         | 124                        | 137                             |
| <i>h</i>         | 7                          | 8                               |
| <i>S</i>         | 5                          | 6                               |
| <i>Hd</i>        | 0.695±0.031                | 0.717±0.025                     |
| $\pi \times 100$ | 0.189±0.014                | 0.199±0.013                     |

**Table S2.** Description of the eight haplotypes of *G. longipes* observed based in their nucleotide composition at the polymorphic sites. All sequences were aligned presenting a total length of 572 bp. Polymorphic sites are referred to this length.

| Haplotype | Nucleotide composition at the polymorphic sites     |
|-----------|-----------------------------------------------------|
| Reference | 49 (A), 286 (G), 292 (C), 367 (G), 424 (C), 496 (A) |
| Glon_1    | 286 (A/G)                                           |
| Glon_2    | 286 (G)                                             |
| Glon_3    | 286 (A), 367 (T)                                    |
| Glon_4    | 286 (A), 49 (G)                                     |
| Glon_5    | 286 (A), 292 (T), 496 (G)                           |
| Glon_6    | 286 (A), 367 (G/T)                                  |
| Glon_7    | 286 (A/G), 367 (G/T)                                |
| Glon_8    | 286 (A), 367 (T), 424 (A)                           |
